# Supplementary material for: The phonon confinement effect in two-dimensional nanocrystals of black phosphorus with anisotropic phonon dispersions
Source: Royal Society of Chemistry journal article supplement (doi:10.1039/c8nr01531g), 2018-01-01
Supplement: c8nr01531g1.pdf [file c8nr01531g1.pdf]

# Phonon confinement effect in two-dimensional nanocrystals of black phosphorus with anisotropic phonon dispersions†

Tong Lin,<sup>‡ab</sup> Xin Cong,<sup>‡ab</sup> Miao-Ling Lin,<sup>ab</sup> Xue-lu Liu<sup>\*ab</sup> and Ping-Heng Tan<sup>\*ab</sup>

<sup>a</sup> State Key Laboratory of Superlattices and Microstructures, Institute of Semiconductors, Chinese Academy of Sciences, Beijing 100083, China

<sup>b</sup> CAS Center of Excellence in Topological Quantum Computation, and College of Materials Science and Opto-Electronic Technology, University of Chinese Academy of Science, Beijing 100049, China.

† These authors contributed equally to this work.

\* E-mail: [liuxuelu@semi.ac.cn](mailto:liuxuelu@semi.ac.cn), [phtan@semi.ac.cn](mailto:phtan@semi.ac.cn)

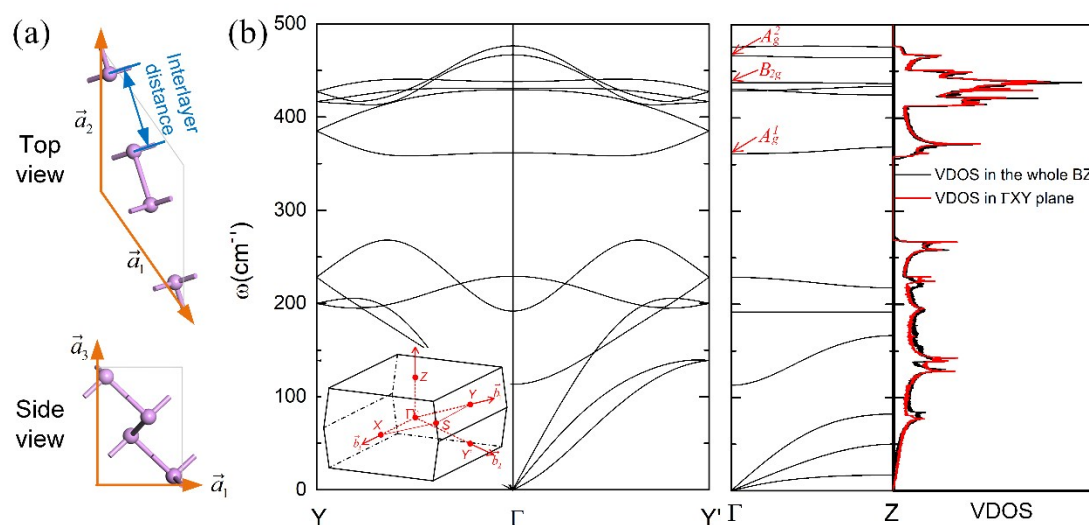

Fig. S1. (a) The unit cell of bulk BP with top and side view, where  $\vec{a}_1$ ,  $\vec{a}_2$  and  $\vec{a}_3$  indicate lattice vectors. (b) Phonon dispersion of bulk BP and vibrational density of states (VDOS) in  $\Gamma XY$  plane (red) and the whole BZ (black). The insert shows BZ of the unit cell, where  $\vec{b}_1$ ,  $\vec{b}_2$  and  $\vec{b}_3$  indicate reciprocal lattice vectors. VDOS in  $\Gamma XY$  plane and in the whole BZ show a little discrepancy in low frequency range ( $\omega < 300\text{cm}^{-1}$ ), while they are almost the same in the high frequency range ( $\omega > 300\text{cm}^{-1}$ ).

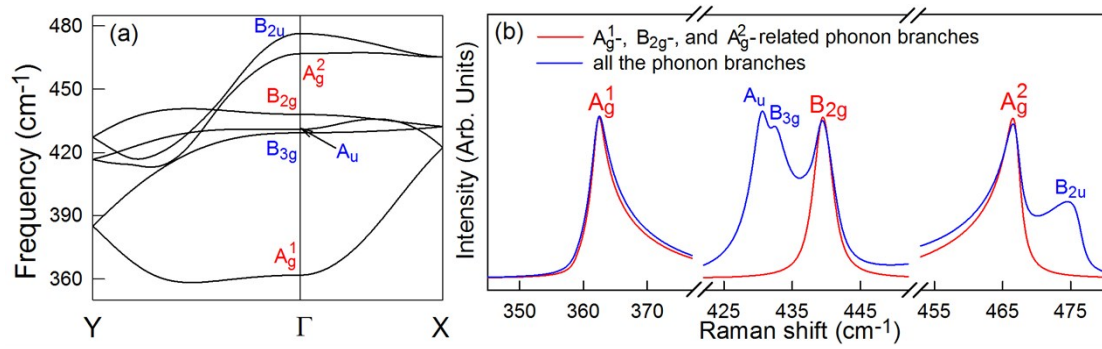

Fig. S2 (a) Phonon dispersion along  $\Gamma X$  and  $\Gamma Y$  directions, and the vibration modes at  $\Gamma$  point are divided into Raman active (red) and inactive (blue) modes. (b) Line shape of Raman modes considering the contributions from the  $A_{g-}^2$ ,  $B_{2g-}$  and  $A_{g-}^1$ -related phonon branches (red) and that from all the phonon branches (blue). Both of two profiles are stimulated with  $L_D=2\text{nm}$ ,  $\alpha=18$ . In the latter line shape, additional peaks appear, which are contributed from phonon branches related with Raman-inactive modes at  $\Gamma$  point, i.e.,  $A_u$ ,  $B_{3g}$  and  $B_{2u}$ . Actually, the additional peaks related with Raman-inactive modes cannot be observed in the Raman spectra.
